# Supplementary material
Source: ML conference proceedings conference paper supplement (https://openreview.net/forum?id=OLAYpF9TQtQ)
Supplement: supplementary_material [file attachment]

# Appendix:

## Unsupervised Reinforcement Learning Benchmark

### A Unsupervised Reinforcement Learning Baselines

#### A.1 Knowledge-based Baselines

Prediction methods train a forward dynamics model  $f(\mathbf{o}_{t+1}|\mathbf{o}_t, \mathbf{a}_t)$  and define a self-supervised task based on the outputs of the model prediction.

*Curiosity* [47]: The Intrinsic Curiosity Module (ICM) defines the self-supervised task as the error between the state prediction of a learned dynamics model  $\hat{\mathbf{z}}' \sim g(\mathbf{z}'|\mathbf{z}, \mathbf{a})$  and the observation. The intuition is that parts of the state space that are hard to predict are good to explore because they were likely to be unseen before. An issue with Curiosity is that it is susceptible to the *noisy TV problem* wherein stochastic elements of the environment will always cause high prediction error while not being informative for exploration:

$$r_t^{\text{ICM}} \propto \|g(\mathbf{z}_{t+1}|\mathbf{z}_t, \mathbf{a}_t) - \mathbf{z}_{t+1}\|^2.$$

*Disagreement* [48]: Disagreement is similar to ICM but instead trains an ensemble of forward models and defines the intrinsic reward as the variance (or disagreement) among the models. Disagreement has the favorable property of not being susceptible to the noisy TV problem, since high stochasticity in the environment will result high prediction error but low variance if it has been thoroughly explored:

$$r_t^{\text{Disagreement}} \propto \text{Var}\{g_i(\mathbf{z}_{t+1}|\mathbf{z}_t, \mathbf{a}_t)\} \quad i = 1, \dots, N.$$

*RND* [9]: Random Network Distillation (RND) defines the self-supervised task by predicting the output of a frozen randomly initialized neural network  $\tilde{f}$ . This differs from ICM only in that instead of predicting the next state, which is effectively an environment-defined function, it tries to predict the vector output of a randomly defined function. Similar to ICM, RND can suffer from the noisy TV problem:

$$r_t^{\text{RND}} \propto \|g(\mathbf{z}_t, \mathbf{a}_t) - \tilde{g}(\mathbf{z}_t, \mathbf{a}_t)\|_2^2.$$

#### A.2 Data-based Baselines

Recently, exploration through state entropy maximization has resulted in simple yet effective algorithms for unsupervised pre-training. We implement two leading variants of this approach for URLB.

*APT* [41]: Active Pre-training (APT) utilizes a particle-based estimator [59] that uses  $K$  nearest-neighbors to estimate entropy for a given state or image embedding. Since APT does not itself perform representation learning, it requires an auxiliary representation learning loss to provide latent vectors for entropy estimation, although it is also possible to use random network embeddings [55]. We provide implementations of APT with the forward  $g(\mathbf{z}_{t+1}|\mathbf{z}_t, \mathbf{a}_t)$  and inverse dynamics  $h(\mathbf{a}_t|\mathbf{z}_{t+1}, \mathbf{z}_t)$  representation learning losses:

$$r_t^{\text{APT}} \propto \sum_{j \in \text{random}} \log \|\mathbf{z}_t - \mathbf{z}_j\| \quad j = 1, \dots, K.$$

*ProtoRL* [67]: ProtoRL devises a self-supervised pre-training scheme that allows to decouple representation learning and exploration to enable efficient downstream generalization to previously unseen tasks. For this, ProtoRL uses the contrastive clustering assignment loss from SWaV [11] and learns latent representations and a set of prototypes to form the basis of the latent space. The prototypes are then used for more accurate estimation of entropy of the state-visitation distribution via KNN particle-based estimator:

$$r_t^{\text{Proto}} \propto \sum_{j \in \text{prototypes}} \log \|\mathbf{z}_t - \mathbf{z}_j\| \quad j = 1, \dots, K.$$

### 602 A.3 Competence-based Baselines

603 Competence-based approaches learn skills  $\mathbf{w}$  that maximize the mutual information between encoded  
 604 observations (or states) and skills  $I(\mathbf{z}; \mathbf{w})$ . The mutual information has two decompositions  $I(\mathbf{z}; \mathbf{w}) =$   
 605  $H(\mathbf{w}) - H(\mathbf{w}|\mathbf{z}) = H(\mathbf{z}) - H(\mathbf{z}|\mathbf{w})$ . We provide baselines for both decompositions.

606 *SMM* [39]: SMM minimizes  $D_{KL}(p_\pi(\mathbf{z}) \parallel p^*(\mathbf{z}))$ , which maximizes the state entropy, while  
 607 minimizing the cross entropy from the state to the target state distribution. When using skills,  
 608  $H(\mathbf{z})$  can be rewritten as  $H(\mathbf{z}|\mathbf{w}) + I(\mathbf{z}; \mathbf{w})$ .  $H(\mathbf{z}|\mathbf{w})$  can be maximized by optimizing the reward  
 609  $r = \log q_{\mathbf{w}}(\mathbf{z})$ , which is estimated using a VAE [35] that models the density of  $\mathbf{z}$  while executing  
 610 skill  $\mathbf{w}$ . Similar to other mutual information methods that decompose  $I(\mathbf{z}; \mathbf{w}) = H(\mathbf{w}) - H(\mathbf{w}|\mathbf{z})$ ,  
 611 SMM learns a discriminator  $d(\mathbf{w}|\mathbf{z})$  over a set of discrete skills with a uniform prior that maximizes  
 612  $H(\mathbf{w})$ :

$$r_t^{\text{SMM}} \triangleq \log p^*(\mathbf{z}) - \log q_{\mathbf{w}}(\mathbf{z}) - \log p(\mathbf{w}) + \log d(\mathbf{w}|\mathbf{z}).$$

613 *DIAYN* [20]: DIAYN and similar algorithms such as VIC [23] and VALOR [1] are perhaps the best  
 614 competence-based exploration algorithms. These methods estimate the mutual information through  
 615 the first decomposition  $I(\mathbf{z}; \mathbf{w}) = H(\mathbf{w}) - H(\mathbf{w}|\mathbf{z})$ .  $H(\mathbf{w})$  is kept maximal by drawing  $\mathbf{w} \sim p(\mathbf{w})$   
 616 from a discrete uniform prior distribution and the density  $-H(\mathbf{w}|\mathbf{z})$  is estimated with a discriminator  
 617  $\log q(\mathbf{w}|\mathbf{z})$ .

$$r_t^{\text{DIAYN}} \propto \log q(\mathbf{w}|\mathbf{z}) + \text{const.}$$

618 *APS* [42]: APS is a recent leading mutual information exploration method that uses the second  
 619 decomposition  $I(\mathbf{z}; \mathbf{w}) = H(\mathbf{z}) - H(\mathbf{z}|\mathbf{w})$ .  $H(\mathbf{z})$  is estimated with a particle estimator as in  
 620 APT [41] while  $H(\mathbf{z}|\mathbf{w})$  is estimated with successor features as in VISR [29].<sup>2</sup>

$$r_t^{\text{APS}} \propto r_t^{\text{APT}}(\mathbf{z}) + \log q(\mathbf{z}|\mathbf{w})$$

## 621 B Hyper-parameters

622 In Table 2 we present a common set of hyper-parameters used in our experiments, while in table 3 we  
 623 list individual hyper-parameters for each method.

Table 2: A common set of hyper-parameters used in our experiments.

| Common hyper-parameter              | Value                                      |
|-------------------------------------|--------------------------------------------|
| Replay buffer capacity              | $10^6$                                     |
| Action repeat                       | 1 states-based and 2 for pixels-based      |
| Seed frames                         | 4000                                       |
| $n$ -step returns                   | 3                                          |
| Mini-batch size                     | 1024 states-based and 256 for pixels-based |
| Seed frames                         | 4000                                       |
| Discount ( $\gamma$ )               | 0.99                                       |
| Optimizer                           | Adam                                       |
| Learning rate                       | $10^{-4}$                                  |
| Agent update frequency              | 2                                          |
| Critic target EMA rate ( $\tau_Q$ ) | 0.01                                       |
| Features dim.                       | 1024 states-based and 50 for pixels-based  |
| Hidden dim.                         | 1024                                       |
| Exploration stddev clip             | 0.3                                        |
| Exploration stddev value            | 0.2                                        |
| Number pre-training frames          | up to $2 \times 10^6$                      |
| Number fine-tuning frames           | $1 \times 10^5$                            |

<sup>2</sup>In this benchmark, the generalized policy improvement(GPI) [3] that is used in Atari games for APS and VISR is not implemented for continuous control experiments.

Table 3: Per algorithm sets of hyper-parameters used in our experiments.

| ICM hyper-parameter                       |                                                                                               | Value           |
|-------------------------------------------|-----------------------------------------------------------------------------------------------|-----------------|
| Representation dim.                       |                                                                                               | 512             |
| Reward transformation                     |                                                                                               | $\log(r + 1.0)$ |
| Forward net arch.                         | $( \mathcal{O}  +  \mathcal{A} ) \rightarrow 1024 \rightarrow 1024 \rightarrow  \mathcal{O} $ | ReLU MLP        |
| Inverse net arch.                         | $(2 \times  \mathcal{O} ) \rightarrow 1024 \rightarrow 1024 \rightarrow  \mathcal{A} $        | ReLU MLP        |
| Disagreement hyper-parameter              |                                                                                               | Value           |
| Ensemble size                             |                                                                                               | 5               |
| Forward net arch:                         | $( \mathcal{O}  +  \mathcal{A} ) \rightarrow 1024 \rightarrow 1024 \rightarrow  \mathcal{O} $ | ReLU MLP        |
| RND hyper-parameter                       |                                                                                               | Value           |
| Representation dim.                       |                                                                                               | 512             |
| Predictor & target net arch.              | $ \mathcal{O}  \rightarrow 1024 \rightarrow 1024 \rightarrow 512$                             | ReLU MLP        |
| Normalized observation clipping           |                                                                                               | 5               |
| APT hyper-parameter                       |                                                                                               | Value           |
| Representation dim.                       |                                                                                               | 512             |
| Reward transformation                     |                                                                                               | $\log(r + 1.0)$ |
| Forward net arch.                         | $(512 +  \mathcal{A} ) \rightarrow 1024 \rightarrow 512$                                      | ReLU MLP        |
| Inverse net arch.                         | $(2 \times 512) \rightarrow 1024 \rightarrow  \mathcal{A} $                                   | ReLU MLP        |
| $k$ in NN                                 |                                                                                               | 12              |
| Avg top $k$ in NN                         |                                                                                               | True            |
| ProtoRL hyper-parameter                   |                                                                                               | Value           |
| Predictor dim.                            |                                                                                               | 128             |
| Projector dim.                            |                                                                                               | 512             |
| Number of prototypes                      |                                                                                               | 512             |
| Softmax temperature                       |                                                                                               | 0.1             |
| $k$ in NN                                 |                                                                                               | 3               |
| Number of candidates per prototype        |                                                                                               | 4               |
| Encoder target EMA rate ( $\tau_{enc}$ )  |                                                                                               | 0.05            |
| Intrinsic reward coefficient ( $\alpha$ ) |                                                                                               | 0.2             |
| SMM hyper-parameter                       |                                                                                               | Value           |
| Skill dim.                                |                                                                                               | 4               |
| Skill discrim lr                          |                                                                                               | $10^{-3}$       |
| VAE lr                                    |                                                                                               | $10^{-2}$       |
| DIAYN hyper-parameter                     |                                                                                               | Value           |
| Skill dim                                 |                                                                                               | 16              |
| Skill sampling frequency (steps)          |                                                                                               | 50              |
| Discriminator net arch.                   | $512 \rightarrow 1024 \rightarrow 1024 \rightarrow 16$                                        | ReLU MLP        |
| APS hyper-parameter                       |                                                                                               | Value           |
| Representation dim.                       |                                                                                               | 512             |
| Reward transformation                     |                                                                                               | $\log(r + 1.0)$ |
| Successor feature dim.                    |                                                                                               | 10              |
| Successor feature net arch.               | $ \mathcal{O}  \rightarrow 1024 \rightarrow 1024 \rightarrow 10$                              | ReLU MLP        |
| $k$ in NN                                 |                                                                                               | 12              |
| Avg top $k$ in NN                         |                                                                                               | True            |
| Least square batch size                   |                                                                                               | 4096            |

## 624 C Per-domain Individual Results

625 Individual fine-tuning results for each methods are shown in Figure 5. Furthermore, Figures 6 and 7  
 626 demonstrate individual results of states and pixels based fine-tuning performance as a function of  
 627 pre-training steps for each considered method and task.

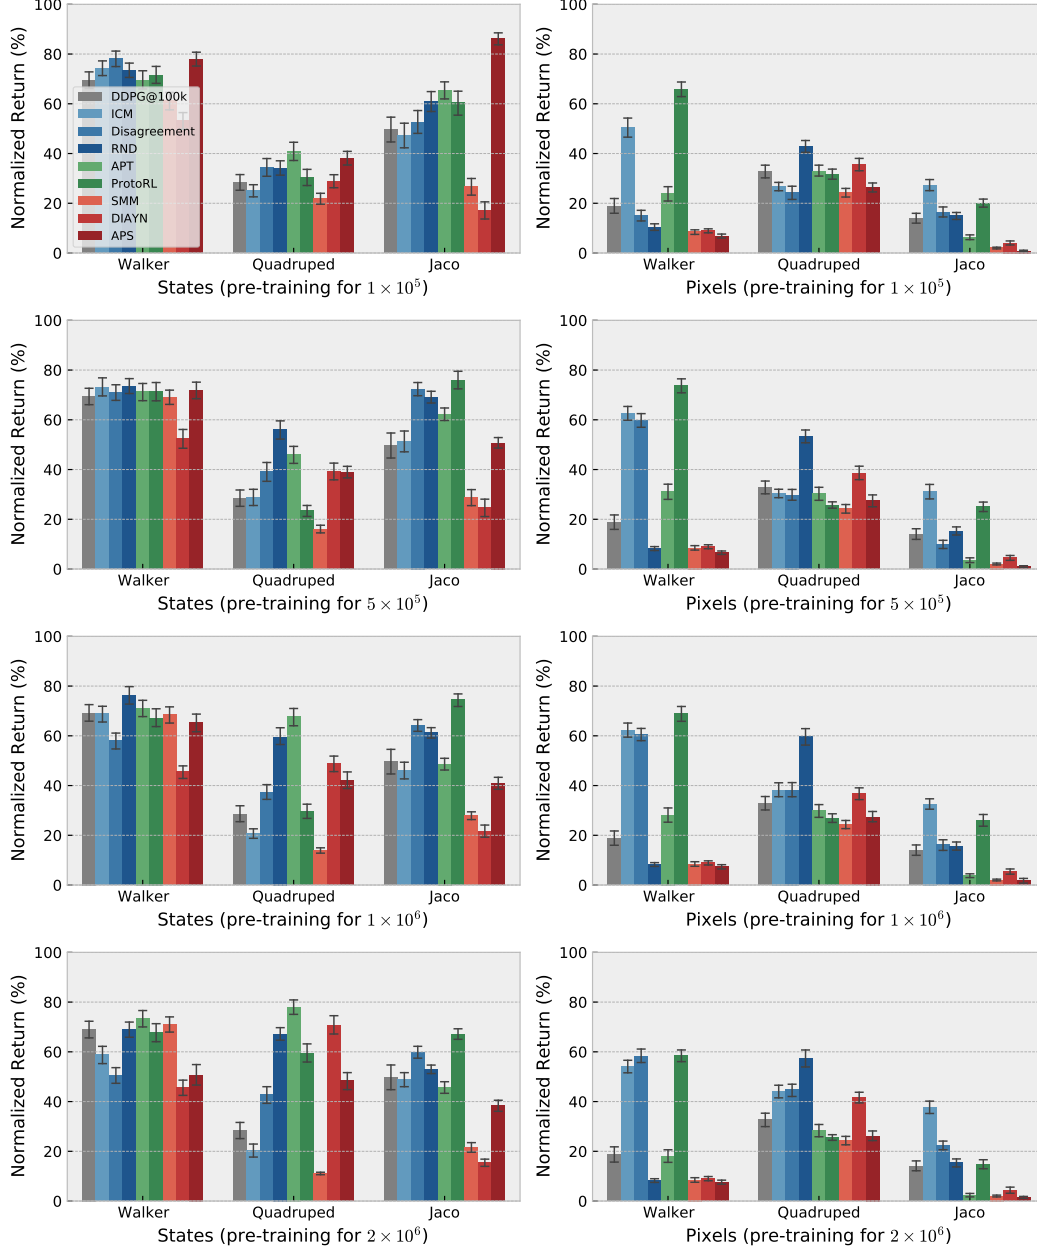

Figure 5: Individual results of fine-tuning for 100k steps after different degrees of pre-training for each considered method. The performance is aggregated across all the tasks within a domain and normalized with respect to the optimal performance.

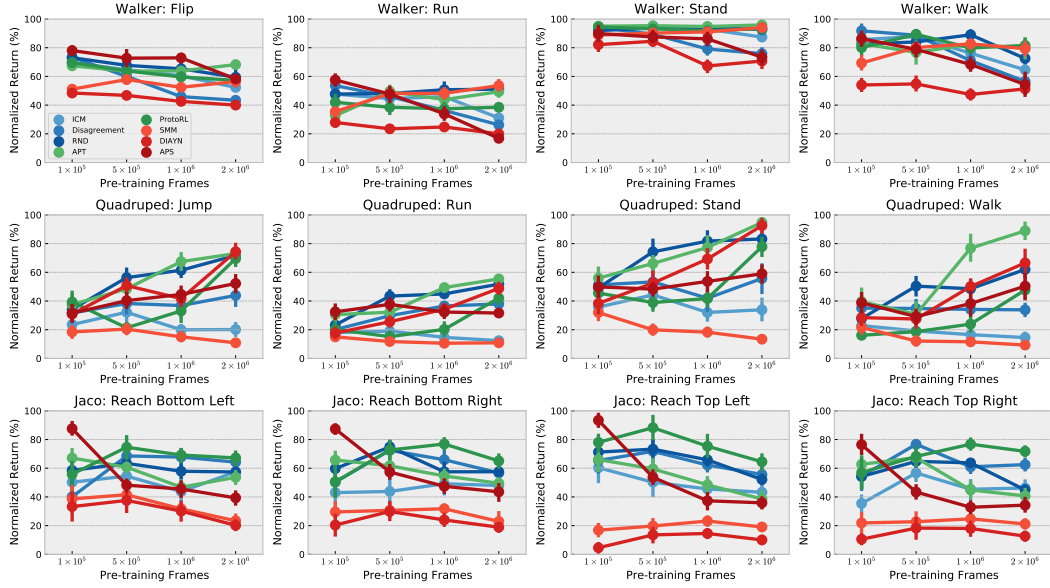

Figure 6: Individual results of fine-tuning efficiency as a function of pre-training steps for states-based learning.

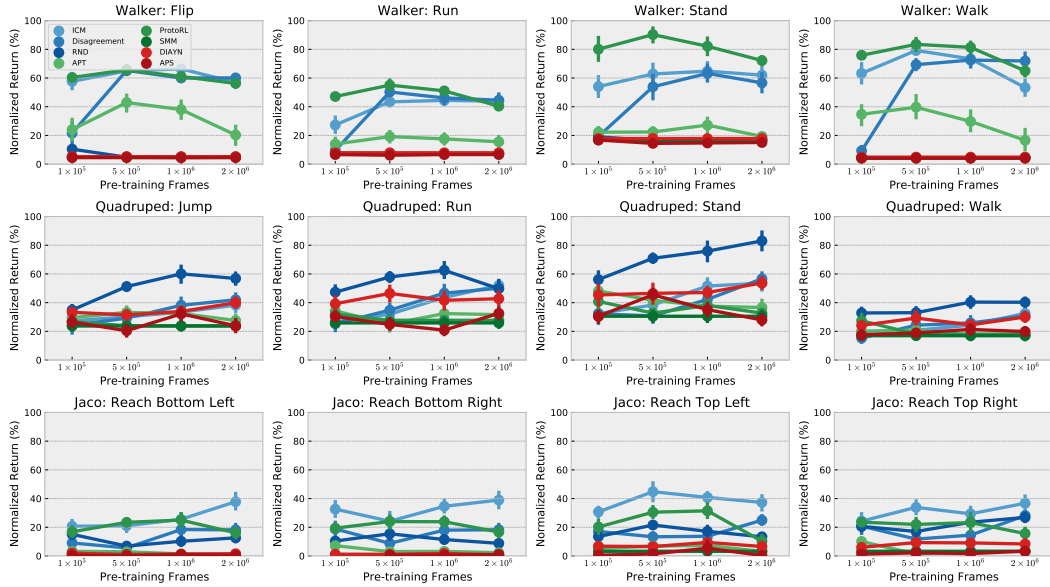

Figure 7: Individual results of fine-tuning efficiency as a function of pre-training steps for pixels-based learning.

## 628 D Individual Numerical Results

629 The individual numerical results of fine-tuning for each task and each method are presented in Table 4  
630 for states-based learning, and in Table 5 for pixels-based learning.

| Pre-training for $1 \times 10^5$ frames |                    |        |        |              |        |        |         |        |        |        |
|-----------------------------------------|--------------------|--------|--------|--------------|--------|--------|---------|--------|--------|--------|
| Domain                                  | Task               | DDPG   | ICM    | Disagreement | RND    | APT    | ProtoRL | SMM    | DIAYN  | APS    |
| Walker                                  | Flip               | 538±27 | 555±20 | 585±26       | 583±22 | 537±13 | 556±18  | 408±12 | 386±19 | 622±20 |
|                                         | Run                | 325±25 | 379±26 | 426±20       | 379±23 | 259±17 | 333±38  | 282±18 | 222±23 | 457±28 |
|                                         | Stand              | 899±23 | 926±9  | 926±9        | 904±13 | 934±9  | 928±17  | 873±38 | 808±43 | 884±47 |
|                                         | Walk               | 748±47 | 832±31 | 891±37       | 800±40 | 803±31 | 777±46  | 673±42 | 524±37 | 838±46 |
| Quadruped                               | Jump               | 236±48 | 209±32 | 281±58       | 304±44 | 333±58 | 348±62  | 163±33 | 274±43 | 280±49 |
|                                         | Run                | 157±31 | 159±31 | 178±41       | 206±32 | 271±46 | 179±42  | 133±19 | 157±32 | 288±42 |
|                                         | Stand              | 392±73 | 329±65 | 471±78       | 452±60 | 515±69 | 419±62  | 294±44 | 352±60 | 458±61 |
|                                         | Walk               | 229±57 | 198±30 | 304±55       | 240±41 | 342±81 | 139±16  | 187±36 | 246±40 | 335±55 |
| Jaco                                    | Reach bottom left  | 72±22  | 97±22  | 77±20        | 113±19 | 129±12 | 107±18  | 74±16  | 64±18  | 169±8  |
|                                         | Reach bottom right | 117±18 | 87±21  | 102±19       | 121±15 | 133±11 | 102±21  | 60±13  | 41±14  | 177±6  |
|                                         | Reach top left     | 116±22 | 115±19 | 124±16       | 136±10 | 126±16 | 149±11  | 32±7   | 8±5    | 178±7  |
|                                         | Reach top right    | 94±18  | 79±13  | 121±20       | 120±15 | 139±16 | 126±24  | 48±13  | 23±7   | 170±14 |
| Pre-training for $5 \times 10^5$ frames |                    |        |        |              |        |        |         |        |        |        |
| Domain                                  | Task               | DDPG   | ICM    | Disagreement | RND    | APT    | ProtoRL | SMM    | DIAYN  | APS    |
| Walker                                  | Flip               | 538±27 | 516±21 | 479±19       | 540±27 | 508±21 | 509±18  | 461±24 | 373±6  | 580±43 |
|                                         | Run                | 325±25 | 354±34 | 366±28       | 382±20 | 393±29 | 306±36  | 382±24 | 186±9  | 379±40 |
|                                         | Stand              | 899±23 | 934±6  | 878±25       | 921±6  | 937±10 | 916±17  | 887±25 | 830±28 | 860±36 |
|                                         | Walk               | 748±47 | 852±35 | 861±29       | 816±34 | 745±73 | 867±20  | 778±25 | 532±43 | 765±44 |
| Quadruped                               | Jump               | 236±48 | 285±56 | 339±57       | 500±59 | 430±38 | 189±27  | 181±29 | 450±44 | 357±44 |
|                                         | Run                | 157±31 | 169±39 | 264±44       | 385±35 | 286±26 | 134±27  | 104±15 | 226±28 | 334±35 |
|                                         | Stand              | 392±73 | 407±85 | 490±101      | 683±76 | 608±46 | 358±52  | 183±31 | 483±71 | 444±36 |
|                                         | Walk               | 229±57 | 165±31 | 301±53       | 436±56 | 266±71 | 161±23  | 105±25 | 238±51 | 252±41 |
| Jaco                                    | Reach bottom left  | 72±22  | 105±20 | 132±12       | 122±9  | 117±5  | 144±15  | 80±14  | 72±15  | 93±7   |
|                                         | Reach bottom right | 117±18 | 89±19  | 147±12       | 152±7  | 125±11 | 147±12  | 62±9   | 60±12  | 116±9  |
|                                         | Reach top left     | 116±22 | 95±18  | 137±13       | 139±11 | 113±12 | 168±14  | 37±8   | 25±8   | 102±8  |
|                                         | Reach top right    | 94±18  | 126±11 | 171±5        | 144±7  | 150±11 | 152±13  | 50±13  | 40±15  | 96±9   |
| Pre-training for $1 \times 10^6$ frames |                    |        |        |              |        |        |         |        |        |        |
| Domain                                  | Task               | DDPG   | ICM    | Disagreement | RND    | APT    | ProtoRL | SMM    | DIAYN  | APS    |
| Walker                                  | Flip               | 538±27 | 482±23 | 366±18       | 521±35 | 509±16 | 476±21  | 418±16 | 340±17 | 582±20 |
|                                         | Run                | 325±25 | 365±29 | 288±24       | 403±39 | 348±29 | 298±30  | 383±27 | 197±10 | 269±32 |
|                                         | Stand              | 899±23 | 914±10 | 777±34       | 926±8  | 932±6  | 902±27  | 894±13 | 661±36 | 847±39 |
|                                         | Walk               | 748±47 | 739±40 | 689±49       | 864±26 | 800±25 | 775±26  | 802±28 | 460±30 | 663±43 |
| Quadruped                               | Jump               | 236±48 | 177±29 | 327±69       | 545±39 | 599±48 | 294±66  | 133±23 | 370±49 | 395±46 |
|                                         | Run                | 157±31 | 130±22 | 324±22       | 399±21 | 438±20 | 179±40  | 94±13  | 304±31 | 287±36 |
|                                         | Stand              | 392±73 | 294±50 | 386±85       | 752±63 | 711±72 | 384±44  | 168±25 | 637±60 | 494±59 |
|                                         | Walk               | 229±57 | 143±24 | 295±31       | 420±52 | 665±76 | 207±41  | 100±18 | 433±40 | 331±70 |
| Jaco                                    | Reach bottom left  | 72±22  | 84±17  | 130±10       | 111±9  | 90±8   | 133±8   | 61±6   | 58±12  | 87±10  |
|                                         | Reach bottom right | 117±18 | 100±14 | 134±12       | 116±12 | 111±8  | 156±7   | 64±5   | 48±7   | 96±9   |
|                                         | Reach top left     | 116±22 | 87±12  | 118±8        | 125±6  | 92±9   | 143±14  | 44±5   | 27±5   | 71±10  |
|                                         | Reach top right    | 94±18  | 101±14 | 136±8        | 142±5  | 100±11 | 171±8   | 55±7   | 40±10  | 73±9   |
| Pre-training for $2 \times 10^6$ frames |                    |        |        |              |        |        |         |        |        |        |
| Domain                                  | Task               | DDPG   | ICM    | Disagreement | RND    | APT    | ProtoRL | SMM    | DIAYN  | APS    |
| Walker                                  | Flip               | 538±27 | 417±16 | 346±13       | 474±39 | 544±14 | 456±12  | 450±24 | 319±17 | 465±20 |
|                                         | Run                | 325±25 | 247±21 | 208±15       | 406±30 | 392±26 | 306±13  | 426±26 | 158±8  | 134±16 |
|                                         | Stand              | 899±23 | 859±23 | 746±34       | 911±5  | 942±6  | 917±27  | 924±12 | 695±46 | 721±44 |
|                                         | Walk               | 748±47 | 627±42 | 549±37       | 704±30 | 773±70 | 792±41  | 770±44 | 498±27 | 527±79 |
| Quadruped                               | Jump               | 236±48 | 178±35 | 389±62       | 637±12 | 648±18 | 617±44  | 96±7   | 660±43 | 463±51 |
|                                         | Run                | 157±31 | 110±18 | 337±30       | 459±6  | 492±14 | 373±33  | 96±6   | 433±29 | 281±17 |
|                                         | Stand              | 392±73 | 312±68 | 512±89       | 766±43 | 872±23 | 716±56  | 123±11 | 851±43 | 542±53 |
|                                         | Walk               | 229±57 | 126±27 | 293±37       | 536±39 | 770±47 | 412±54  | 80±6   | 576±81 | 436±79 |
| Jaco                                    | Reach bottom left  | 72±22  | 111±11 | 124±7        | 110±5  | 103±8  | 129±8   | 45±7   | 39±6   | 76±8   |
|                                         | Reach bottom right | 117±18 | 97±9   | 115±10       | 117±7  | 100±6  | 132±8   | 46±11  | 38±5   | 88±11  |
|                                         | Reach top left     | 116±22 | 82±14  | 106±12       | 99±6   | 73±12  | 123±9   | 36±3   | 19±4   | 68±6   |
|                                         | Reach top right    | 94±18  | 103±11 | 139±7        | 100±6  | 90±10  | 159±7   | 47±6   | 28±6   | 76±10  |

Table 4: Individual results of fine-tuning for  $1 \times 10^5$  frames after different levels of pre-training in the states-based settings.

## 631 E Compute Resources

632 URLB is designed to be accessible to the RL research community. Both state and pixel-based  
633 algorithms are implemented such that each algorithm requires a single GPU. For local debugging  
634 experiments we used NVIDIA RTX GPUs. For large-scale runs used to generate all results in this  
635 manuscripts, we used NVIDIA Tesla V100 GPU instances. All experiments were run on internal  
636 clusters. Each algorithm trains in roughly 30 mins - 12 hours depending on the snapshot (100k, 500k,  
637 1M, 2M) and input (states, pixels). Since this benchmark required roughly 8k experiments (2 states /  
638 pixels, 12 tasks, 8 algorithms, 10 seeds, 4 snapshots) a total of 100 V100 GPUs were used to produce

| Pre-training for $1 \times 10^5$ frames |                    |        |        |              |        |        |         |        |        |        |
|-----------------------------------------|--------------------|--------|--------|--------------|--------|--------|---------|--------|--------|--------|
| Domain                                  | Task               | DDPG   | ICM    | Disagreement | RND    | APT    | ProtoRL | SMM    | DIAYN  | APS    |
| Walker                                  | Flip               | 81±23  | 319±29 | 119±36       | 57±15  | 133±40 | 334±8   | 28±3   | 28±0   | 25±2   |
|                                         | Run                | 41±11  | 91±19  | 31±6         | 25±2   | 46±12  | 157±6   | 24±2   | 26±0   | 22±2   |
|                                         | Stand              | 212±28 | 473±63 | 169±25       | 166±22 | 195±28 | 701±75  | 147±16 | 156±1  | 147±7  |
|                                         | Walk               | 141±53 | 369±43 | 54±19        | 26±2   | 202±39 | 442±11  | 26±2   | 28±0   | 23±2   |
| Quadruped                               | Jump               | 278±35 | 200±24 | 176±37       | 256±23 | 217±23 | 196±21  | 174±21 | 244±18 | 195±28 |
|                                         | Run                | 156±21 | 125±14 | 119±24       | 223±20 | 161±19 | 150±16  | 121±15 | 184±22 | 143±14 |
|                                         | Stand              | 309±47 | 258±28 | 257±57       | 448±42 | 384±25 | 326±40  | 243±30 | 362±57 | 243±32 |
|                                         | Walk               | 151±31 | 142±16 | 109±21       | 235±25 | 142±17 | 196±29  | 121±15 | 173±11 | 125±23 |
| Jaco                                    | Reach bottom left  | 23±10  | 46±8   | 20±7         | 34±6   | 7±2    | 38±7    | 2±1    | 4±1    | 1±0    |
|                                         | Reach bottom right | 23±8   | 67±10  | 38±10        | 21±3   | 14±4   | 39±5    | 1±0    | 2±1    | 1±0    |
|                                         | Reach top left     | 40±9   | 69±8   | 38±6         | 30±5   | 11±3   | 45±10   | 7±1    | 15±5   | 1±1    |
|                                         | Reach top right    | 37±9   | 54±12  | 46±11        | 46±7   | 22±5   | 53±4    | 7±1    | 13±5   | 2±1    |
| Pre-training for $5 \times 10^5$ frames |                    |        |        |              |        |        |         |        |        |        |
| Domain                                  | Task               | DDPG   | ICM    | Disagreement | RND    | APT    | ProtoRL | SMM    | DIAYN  | APS    |
| Walker                                  | Flip               | 81±23  | 359±9  | 361±12       | 26±0   | 237±31 | 363±16  | 28±3   | 28±0   | 25±2   |
|                                         | Run                | 41±11  | 144±9  | 167±7        | 24±0   | 64±12  | 183±10  | 24±2   | 26±0   | 20±1   |
|                                         | Stand              | 212±28 | 550±60 | 472±74       | 144±4  | 196±24 | 791±43  | 147±16 | 156±1  | 126±9  |
|                                         | Walk               | 141±53 | 462±16 | 404±20       | 26±0   | 231±47 | 487±24  | 26±2   | 28±0   | 23±2   |
| Quadruped                               | Jump               | 278±35 | 221±28 | 214±38       | 376±19 | 244±28 | 175±13  | 174±21 | 231±23 | 150±28 |
|                                         | Run                | 156±21 | 150±13 | 163±19       | 272±14 | 118±23 | 130±9   | 121±15 | 218±25 | 117±17 |
|                                         | Stand              | 309±47 | 306±28 | 245±36       | 566±23 | 333±53 | 261±19  | 243±30 | 371±53 | 363±26 |
|                                         | Walk               | 151±31 | 148±12 | 173±17       | 236±26 | 149±26 | 129±9   | 121±15 | 209±33 | 135±15 |
| Jaco                                    | Reach bottom left  | 23±10  | 47±9   | 12±5         | 15±3   | 6±5    | 53±5    | 2±1    | 1±0    | 0±0    |
|                                         | Reach bottom right | 23±8   | 49±12  | 18±7         | 31±7   | 6±2    | 49±8    | 0±0    | 2±0    | 1±0    |
|                                         | Reach top left     | 40±9   | 101±14 | 30±6         | 49±5   | 15±5   | 69±8    | 7±1    | 14±2   | 3±3    |
|                                         | Reach top right    | 37±9   | 76±10  | 26±9         | 38±6   | 2±1    | 49±9    | 7±1    | 21±6   | 4±2    |
| Pre-training for $1 \times 10^6$ frames |                    |        |        |              |        |        |         |        |        |        |
| Domain                                  | Task               | DDPG   | ICM    | Disagreement | RND    | APT    | ProtoRL | SMM    | DIAYN  | APS    |
| Walker                                  | Flip               | 81±23  | 367±12 | 332±9        | 26±0   | 210±33 | 337±7   | 28±3   | 28±0   | 24±2   |
|                                         | Run                | 41±11  | 148±10 | 154±14       | 24±0   | 58±12  | 170±6   | 24±2   | 26±0   | 22±2   |
|                                         | Stand              | 212±28 | 567±50 | 554±48       | 144±4  | 238±44 | 719±53  | 147±16 | 156±1  | 129±16 |
|                                         | Walk               | 141±53 | 428±32 | 423±28       | 26±0   | 173±41 | 475±22  | 26±2   | 28±0   | 23±2   |
| Quadruped                               | Jump               | 278±35 | 245±35 | 280±38       | 441±41 | 238±41 | 175±13  | 174±21 | 249±25 | 236±31 |
|                                         | Run                | 156±21 | 205±26 | 219±25       | 294±24 | 152±24 | 130±9   | 121±15 | 196±27 | 98±14  |
|                                         | Stand              | 309±47 | 412±38 | 337±46       | 606±54 | 300±38 | 304±41  | 243±30 | 376±29 | 280±37 |
|                                         | Walk               | 151±31 | 174±25 | 185±34       | 289±26 | 124±23 | 129±9   | 121±15 | 175±18 | 152±23 |
| Jaco                                    | Reach bottom left  | 23±10  | 57±8   | 41±9         | 23±7   | 3±2    | 56±10   | 2±1    | 2±1    | 1±1    |
|                                         | Reach bottom right | 23±8   | 71±8   | 36±14        | 23±5   | 6±2    | 49±6    | 0±0    | 3±1    | 0±0    |
|                                         | Reach top left     | 40±9   | 92±7   | 31±7         | 39±8   | 16±3   | 71±11   | 7±1    | 21±5   | 12±11  |
|                                         | Reach top right    | 37±9   | 66±10  | 32±7         | 53±5   | 7±4    | 52±14   | 7±1    | 20±4   | 3±2    |
| Pre-training for $2 \times 10^6$ frames |                    |        |        |              |        |        |         |        |        |        |
| Domain                                  | Task               | DDPG   | ICM    | Disagreement | RND    | APT    | ProtoRL | SMM    | DIAYN  | APS    |
| Walker                                  | Flip               | 81±23  | 315±20 | 332±9        | 26±0   | 112±36 | 311±5   | 28±3   | 28±0   | 25±2   |
|                                         | Run                | 41±11  | 146±11 | 148±14       | 24±0   | 52±13  | 134±7   | 24±2   | 26±0   | 22±2   |
|                                         | Stand              | 212±28 | 543±49 | 496±58       | 144±4  | 169±19 | 632±24  | 147±16 | 156±1  | 132±13 |
|                                         | Walk               | 141±53 | 311±33 | 419±34       | 26±0   | 97±39  | 379±19  | 26±2   | 28±0   | 23±2   |
| Quadruped                               | Jump               | 278±35 | 281±34 | 308±30       | 418±29 | 202±29 | 175±13  | 174±21 | 293±24 | 175±31 |
|                                         | Run                | 156±21 | 245±16 | 235±21       | 234±27 | 149±27 | 130±9   | 121±15 | 201±21 | 153±17 |
|                                         | Stand              | 309±47 | 428±42 | 452±34       | 663±55 | 292±37 | 261±19  | 243±30 | 429±32 | 223±30 |
|                                         | Walk               | 151±31 | 233±23 | 219±17       | 288±22 | 122±23 | 129±9   | 121±15 | 214±23 | 142±19 |
| Jaco                                    | Reach bottom left  | 23±10  | 85±12  | 41±8         | 28±6   | 1±0    | 36±8    | 2±1    | 3±1    | 0±0    |
|                                         | Reach bottom right | 23±8   | 80±10  | 37±7         | 18±4   | 4±1    | 34±7    | 0±0    | 1±0    | 2±0    |
|                                         | Reach top left     | 40±9   | 84±11  | 56±6         | 30±5   | 7±1    | 23±9    | 7±1    | 15±6   | 0±0    |
|                                         | Reach top right    | 37±9   | 82±12  | 63±6         | 60±6   | 7±5    | 35±8    | 7±1    | 18±7   | 7±2    |

Table 5: Individual results of fine-tuning for  $1 \times 10^5$  frames after different levels of pre-training in the pixels-based settings.

639 the results in this benchmark. Researchers who wish to build on URLB will, of course, not need to  
640 run this many experiments since they can utilize the results presented in this benchmark.
